# Supplementary material for: Comprehensive Transcriptome Analysis Uncovers Hub Long Non-coding RNAs Regulating Potassium Use Efficiency in Nicotiana tabacum
Source: Front Plant Sci. 2022 Mar 31;13:777308. doi: 10.3389/fpls.2022.777308 (PMC9008783; doi:10.3389/fpls.2022.777308)
Supplement: Supplementary Table 6 — GO enrichment result associated with tissues x treatments. [file Table_6.XLSX]

## Sheet: Shoot
source	term_name	term_id	adjusted_p_value	-log10(padjusted)	term_size	query_size	intersection_size
GO:MF	symporter activity	GO:0015293	0.0141263	1.84997	101	272	8
GO:BP	response to stimulus	GO:0050896	3.25786e-12	11.4871	6465	273	137
GO:BP	response to chemical	GO:0042221	2.49744e-09	8.6025	3153	273	81
GO:BP	response to oxygen-containing compound	GO:1901700	1.16371e-07	6.93416	1691	273	52
GO:BP	cellular response to chemical stimulus	GO:0070887	5.05818e-06	5.29601	1716	273	49
GO:BP	response to abiotic stimulus	GO:0009628	9.72215e-06	5.01224	2214	273	57
GO:BP	response to organic substance	GO:0010033	1.48217e-05	4.8291	2063	273	54
GO:BP	response to stress	GO:0006950	1.61367e-05	4.79219	3906	273	83
GO:BP	cellular response to hypoxia	GO:0071456	2.27278e-05	4.64344	239	273	16
GO:BP	cellular response to decreased oxygen levels	GO:0036294	2.55414e-05	4.59276	241	273	16
GO:BP	cellular response to oxygen levels	GO:0071453	2.55414e-05	4.59276	241	273	16
GO:BP	response to hypoxia	GO:0001666	9.50641e-05	4.02198	265	273	16
GO:BP	response to decreased oxygen levels	GO:0036293	0.000116666	3.93306	269	273	16
GO:BP	response to oxygen levels	GO:0070482	0.000122722	3.91108	270	273	16
GO:BP	response to other organism	GO:0051707	0.00288696	2.53956	1457	273	38
GO:BP	response to external biotic stimulus	GO:0043207	0.00288696	2.53956	1457	273	38
GO:BP	biological process involved in interspecies interaction between organisms	GO:0044419	0.0037213	2.4293	1473	273	38
GO:BP	response to biotic stimulus	GO:0009607	0.00428371	2.36818	1482	273	38
GO:BP	defense response	GO:0006952	0.01772	1.75154	1700	273	40
GO:BP	response to chitin	GO:0010200	0.0323759	1.48978	138	273	9
GO:CC	cell periphery	GO:0071944	6.54557e-07	6.18405	4164	260	92
GO:CC	membrane	GO:0016020	0.000557285	3.25392	9599	260	156
GO:CC	plasma membrane	GO:0005886	0.00146458	2.83429	3465	260	71
GO:CC	external encapsulating structure	GO:0030312	0.00577776	2.23824	813	260	25
GO:CC	integral component of membrane	GO:0016021	0.0222818	1.65205	6861	260	114
GO:CC	intrinsic component of membrane	GO:0031224	0.0281856	1.54997	7048	260	116
GO:CC	cell wall	GO:0005618	0.0288126	1.54042	793	260	23

## Sheet: Root
source	term_name	term_id	adjusted_p_value	-log10(padjusted)	term_size	query_size	intersection_size
GO:MF	water channel activity	GO:0015250	5.96077e-07	6.2247	28	580	10
GO:MF	water transmembrane transporter activity	GO:0005372	5.96077e-07	6.2247	28	580	10
GO:MF	transcription cis-regulatory region binding	GO:0000976	2.37446e-05	4.62444	1010	580	58
GO:MF	transcription regulatory region nucleic acid binding	GO:0001067	2.37446e-05	4.62444	1010	580	58
GO:MF	inorganic molecular entity transmembrane transporter activity	GO:0015318	4.95548e-05	4.30491	547	580	38
GO:MF	sequence-specific double-stranded DNA binding	GO:1990837	5.43118e-05	4.26511	1035	580	58
GO:MF	sequence-specific DNA binding	GO:0043565	6.02861e-05	4.21978	1301	580	68
GO:MF	DNA-binding transcription factor activity	GO:0003700	0.000166254	3.77923	1670	580	80
GO:MF	double-stranded DNA binding	GO:0003690	0.000330952	3.48023	1147	580	60
GO:MF	oxidoreductase activity	GO:0016491	0.000381456	3.41856	1677	580	79
GO:MF	oxidoreductase activity, acting on single donors with incorporation of molecular oxygen, incorporation of two atoms of oxygen	GO:0016702	0.00338387	2.47059	29	580	7
GO:MF	transcription regulator activity	GO:0140110	0.00462528	2.33486	1823	580	80
GO:MF	oxidoreductase activity, acting on single donors with incorporation of molecular oxygen	GO:0016701	0.0311867	1.50603	40	580	7
GO:MF	transmembrane transporter activity	GO:0022857	0.0398587	1.39948	1202	580	55
GO:BP	response to stimulus	GO:0050896	2.97889e-15	14.5259	6465	616	271
GO:BP	response to chemical	GO:0042221	6.58401e-15	14.1815	3153	616	163
GO:BP	response to stress	GO:0006950	3.21205e-12	11.4932	3906	616	181
GO:BP	response to abiotic stimulus	GO:0009628	5.63254e-10	9.2493	2214	616	116
GO:BP	cellular response to oxygen levels	GO:0071453	1.13423e-08	7.9453	241	616	29
GO:BP	cellular response to decreased oxygen levels	GO:0036294	1.13423e-08	7.9453	241	616	29
GO:BP	response to decreased oxygen levels	GO:0036293	3.44937e-08	7.46226	269	616	30
GO:BP	response to oxygen levels	GO:0070482	3.7853e-08	7.4219	270	616	30
GO:BP	cellular response to hypoxia	GO:0071456	4.86319e-08	7.31308	239	616	28
GO:BP	response to hypoxia	GO:0001666	1.15631e-07	6.93693	265	616	29
GO:BP	cellular response to chemical stimulus	GO:0070887	1.48145e-07	6.82931	1716	616	91
GO:BP	response to oxygen-containing compound	GO:1901700	3.56138e-07	6.44838	1691	616	89
GO:BP	response to inorganic substance	GO:0010035	3.18805e-05	4.49647	962	616	56
GO:BP	response to organic substance	GO:0010033	3.57461e-05	4.44677	2063	616	96
GO:BP	water transport	GO:0006833	4.60712e-05	4.33657	39	616	10
GO:BP	fluid transport	GO:0042044	4.60712e-05	4.33657	39	616	10
GO:BP	response to hormone	GO:0009725	0.000106411	3.97301	1593	616	78
GO:BP	response to endogenous stimulus	GO:0009719	0.000231717	3.63504	1624	616	78
GO:BP	defense response	GO:0006952	0.000365232	3.43743	1700	616	80
GO:BP	response to lipid	GO:0033993	0.000481417	3.31748	966	616	53
GO:BP	response to water deprivation	GO:0009414	0.00354271	2.45066	402	616	28
GO:BP	cellular response to stimulus	GO:0051716	0.00511602	2.29107	3313	616	128
GO:BP	response to water	GO:0009415	0.00538289	2.26898	411	616	28
GO:BP	anion homeostasis	GO:0055081	0.00586385	2.23182	28	616	7
GO:BP	response to chitin	GO:0010200	0.0171641	1.76538	138	616	14
GO:BP	response to acid chemical	GO:0001101	0.0204566	1.68917	442	616	28
GO:BP	obsolete oxidation-reduction process	GO:0055114	0.0218673	1.6602	1274	616	59
GO:BP	organic acid biosynthetic process	GO:0016053	0.0311309	1.50681	577	616	33
GO:BP	response to nitrogen compound	GO:1901698	0.0313897	1.50321	312	616	22
GO:BP	response to toxic substance	GO:0009636	0.0352902	1.45235	292	616	21
GO:CC	cell periphery	GO:0071944	1.74969e-11	10.757	4164	564	186
GO:CC	external encapsulating structure	GO:0030312	7.33692e-08	7.13449	813	564	55
GO:CC	cell wall	GO:0005618	8.46228e-08	7.07251	793	564	54
GO:CC	intrinsic component of plasma membrane	GO:0031226	9.22767e-06	5.03491	280	564	26
GO:CC	anchored component of membrane	GO:0031225	7.1636e-05	4.14487	331	564	27
GO:CC	plasma membrane	GO:0005886	8.34181e-05	4.07874	3465	564	139
GO:CC	vacuole	GO:0005773	0.000107492	3.96862	1247	564	64
GO:CC	anchoring junction	GO:0070161	0.000157206	3.80353	967	564	53
GO:CC	plasmodesma	GO:0009506	0.000157206	3.80353	967	564	53
GO:CC	cell-cell junction	GO:0005911	0.000157206	3.80353	967	564	53
GO:CC	symplast	GO:0055044	0.000162193	3.78997	968	564	53
GO:CC	cell junction	GO:0030054	0.000172616	3.76292	970	564	53
GO:CC	plant-type cell wall	GO:0009505	0.000383487	3.41625	237	564	21
GO:CC	anchored component of plasma membrane	GO:0046658	0.00090626	3.04275	173	564	17
GO:CC	secretory vesicle	GO:0099503	0.00368891	2.4331	173	564	16
GO:CC	extracellular region	GO:0005576	0.00393342	2.40523	1923	564	82
GO:CC	vacuolar membrane	GO:0005774	0.00483204	2.31587	661	564	37
GO:CC	apoplast	GO:0048046	0.0049931	2.30163	463	564	29
GO:CC	plant-type vacuole	GO:0000325	0.0335844	1.47386	187	564	15
